# Supplementary material
Source: publisher figshare collection journal article supplement (https://sage.figshare.com/ndownloader/files/13998026)
Supplement: Supplementary file 1 [file 13998026]

## **Development of a high throughput lysyl hydroxylase (LH) assay and identification of small molecule inhibitors against LH2**

Ashwini K. Devkota<sup>1</sup>, John R. Veloria<sup>1</sup>, Hou-Fu Guo<sup>3</sup>, Jonathan M. Kurie<sup>3</sup>, Eun Jeong Cho<sup>1\*</sup>, and Kevin N. Dalby<sup>1,2\*</sup>

<sup>1</sup>Targeted Therapeutic Drug Discovery and Development Program, College of Pharmacy, The University of Texas at Austin, TX 78712.

<sup>2</sup>Division of Chemical Biology and Medicinal Chemistry, College of Pharmacy, The University of Texas at Austin, TX 78712

<sup>3</sup>Department of Thoracic Head and Neck Medical Oncology, The University of Texas M. D. Anderson Cancer Center, Houston, TX 77030

Keywords:

Lysyl Hydroxylase-2 (LH2), luminescence, high throughput screen, succinate detection, cancer

**Supplemental Information**

# S1

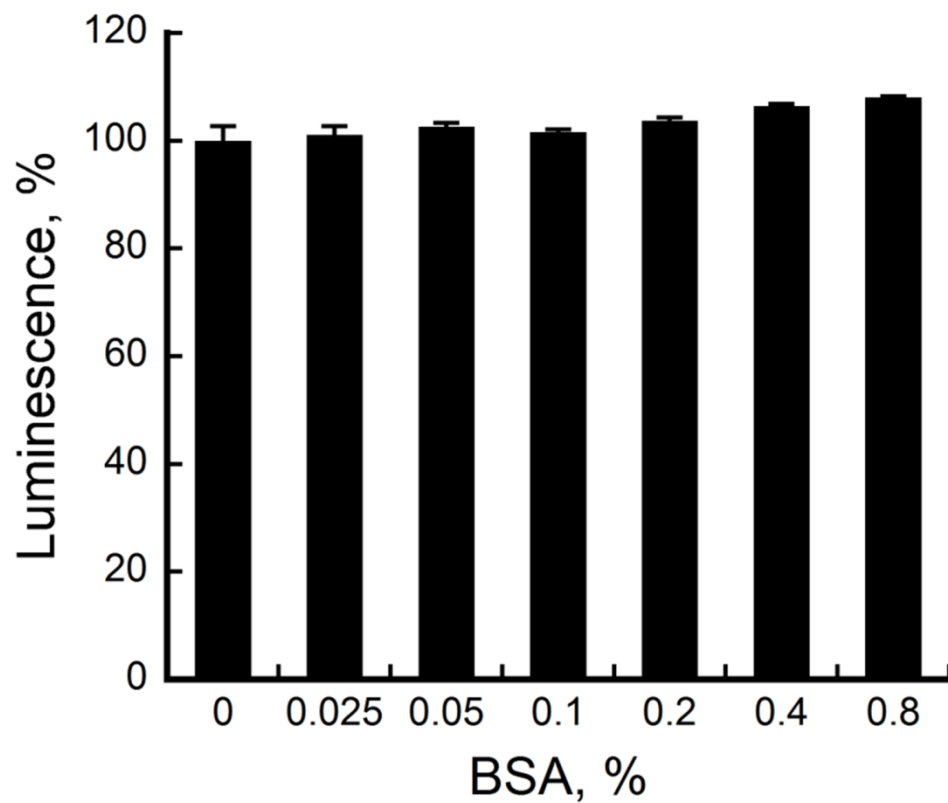

Figure S1. BSA tolerance against the succinate glo kit. Succinate glo assays were performed in the absence of LH<sub>2</sub> using 10  $\mu$ M succinate and different concentrations of BSA (0 – 0.8%) using similar assay conditions described previously.
